# Supplementary material for: Dynamic connectivity patterns of resting-state brain functional networks in healthy individuals after acute alcohol intake
Source: Front Neurosci. 2022 Sep 20;16:974778. doi: 10.3389/fnins.2022.974778 (PMC9531019; doi:10.3389/fnins.2022.974778)
Supplement: Supplementary file 2 [file Data_Sheet_2.xlsx]

## Sheet: Sheet1-State 1 Matrix
Functional Connectivity Matrix for State 1
Subnetwork		BG				AUD	SMN									VIS									CEN															DMN								CB
		IC6	IC58	IC99	IC100	IC15	IC1	IC4	IC8	IC9	IC17	IC31	IC42	IC50	IC70	IC20	IC35	IC41	IC54	IC61	IC63	IC73	IC78	IC86	IC19	IC22	IC26	IC30	IC33	IC64	IC67	IC77	IC82	IC85	IC88	IC89	IC90	IC93	IC97	IC11	IC21	IC29	IC49	IC55	IC60	IC76	IC80	IC7
BG	IC6	0	0.0684461	0.0788356	0.186353	0.0666152	0.166511	0.00109907	0.0664395	0.0973455	0.114291	0.076359	0.0578996	0.1412	0.000496318	-0.0577136	-0.0465541	-0.0745457	0.0193996	0.0193438	-0.0415479	-0.040853	0.0198611	0.0399541	0.132298	0.131887	-0.175825	0.0860702	0.198462	0.0051018	-0.0661517	0.0466992	0.0624566	0.0235789	0.0628328	0.049977	0.0120845	0.135931	-0.00255047	-0.0419639	0.111506	-0.0650972	-0.0475565	-0.107032	-0.0811992	0.0549589	0.0071341	-0.0703061
	IC58	0.0684461	0	0.075557	0.0962665	-0.0464155	0.040261	0.0207888	0.0617709	0.0283515	0.0733687	-0.0091075	0.0252639	0.026704	0.0233475	-0.0173443	0.077651	-0.0473791	-0.024272	0.0152191	-0.00720301	0.000236782	0.00794755	0.000462301	0.0163671	0.0154243	-0.0715739	-0.0113039	0.0354653	-0.0541872	-0.0690438	0.0317316	0.00634891	0.0384351	0.0222657	0.0651668	0.0239553	0.0613214	0.00971321	-0.0117427	-0.014813	-0.0398926	-0.0373121	-0.0443458	-0.0684701	-0.0181701	-0.0670766	0.070177
	IC99	0.0788356	0.075557	0	0.0530742	0.0106686	0.035987	0.0645468	0.022812	0.0462678	0.0835821	0.00999184	0.0639889	0.0776488	0.0114636	0.0107543	0.0232374	-0.0463102	0.0430653	-0.00625891	-0.030169	0.0118198	0.00885516	0.0776731	0.0822187	0.0512792	-0.0840752	0.0599538	0.0326306	-0.0612515	-0.100004	0.149968	-0.0653916	0.0054304	0.00290621	0.0560561	-0.0637371	0.142054	0.0621438	0.00136025	0.128056	-0.0304961	-0.0633225	-0.0349595	-0.0966569	0.0650632	-0.0144921	0.00364067
	IC100	0.186353	0.0962665	0.0530742	0	0.102296	0.193238	0.0223885	0.0936398	0.0824745	0.209799	0.097223	0.0700044	0.206539	-0.0230346	-0.0149373	-0.0692021	-0.078746	-0.0382242	-0.117141	-0.0413518	-0.0541952	0.0474353	-0.0120936	0.171922	0.210093	-0.168511	0.150866	0.192328	0.0300438	-0.136028	0.0435507	0.0913001	0.140427	0.115411	0.0770807	0.0883522	0.172597	0.0203104	-0.119065	0.000848901	-0.166959	-0.11555	-0.212854	-0.123478	0.00842871	-0.122385	0.0127436
AUD	IC15	0.0666152	-0.0464155	0.0106686	0.102296	0	0.143095	0.0496788	0.0964032	0.056943	0.121567	-0.0456391	-0.00841687	0.0726926	-0.170861	0.0801946	-0.00168236	-0.0355414	0.101022	0.00333324	0.076738	0.00179325	0.0915623	-0.0759264	0.0974638	0.0700909	-0.0363193	0.20958	0.100364	0.0162017	-0.0802674	-0.0286078	-0.0208688	0.0510389	-0.110508	0.10229	0.0102396	0.0127756	0.00366642	-0.016548	0.111329	0.0219168	0.0770482	-0.110195	0.0613646	-0.0756564	0.0320043	-0.0102688
SMN	IC1	0.166511	0.040261	0.035987	0.193238	0.143095	0	0.0400448	0.208669	0.179759	0.264637	0.144115	0.119614	0.301412	-0.0470494	0.00667251	-0.0717094	-0.107954	0.0319735	-0.0873159	-0.00777135	-0.00795137	0.00403204	-0.0139489	0.143386	0.315954	-0.215794	0.153865	0.280665	0.0520295	-0.173955	0.0151716	0.0822538	0.137015	0.101958	0.088999	-0.00782417	0.191531	-0.0475241	-0.117802	0.0385882	-0.16214	-0.10637	-0.178657	-0.150076	0.00771807	-0.0586138	-0.00864551
	IC4	0.00109907	0.0207888	0.0645468	0.0223885	0.0496788	0.0400448	0	0.179258	0.0950558	0.0746033	-0.0487874	0.136357	0.0931766	-0.0220693	-0.000300031	0.0516267	-0.0972105	-0.0092502	-0.00234711	-0.0179459	0.00393543	0.00834107	0.0612823	-0.030665	0.0536823	-0.0682222	0.147872	0.0284162	-0.069074	-0.0705511	0.0250343	-0.0479151	0.0527088	-0.0299986	0.0217548	-0.0564311	0.11005	-0.0893938	-0.00560201	0.0553525	-0.0179651	-0.0324757	-0.0251217	-0.0640455	0.0621303	0.00972075	-0.0610003
	IC8	0.0664395	0.0617709	0.022812	0.0936398	0.0964032	0.208669	0.179258	0	0.273708	0.130409	0.000736498	0.103867	0.09475	-0.0107535	0.0481533	0.0474903	-0.0481501	0.0136544	0.00688536	0.0390506	-0.0111589	0.0299997	0.0196421	-0.000952701	0.0811205	-0.102389	0.120951	0.0752291	-0.0510226	-0.092286	-0.0148779	0.0125067	0.0238044	-0.00478145	0.0436034	0.0142528	0.0615319	-0.029896	-0.0648111	0.0389474	-0.0441948	0.00610523	-0.138422	-0.03179	-0.00703503	-0.0338675	-0.00823417
	IC9	0.0973455	0.0283515	0.0462678	0.0824745	0.056943	0.179759	0.0950558	0.273708	0	0.106978	0.0566117	0.0704781	0.0815584	0.0878215	0.0179546	0.00637442	-0.0181009	0.00787745	-0.0198465	0.000473167	-0.00859752	0.00321373	-0.00549509	0.023659	0.135778	-0.105093	0.0716068	0.0804863	0.0202833	-0.0699908	0.00955662	0.054908	-0.0374558	0.0575743	0.00840022	0.00920159	0.0666431	-0.0274868	-0.0657742	0.0290343	-0.0545776	-0.0566418	-0.13868	-0.0814447	-0.000262281	-0.0342926	-0.0100188
	IC17	0.114291	0.0733687	0.0835821	0.209799	0.121567	0.264637	0.0746033	0.130409	0.106978	0	0.0724525	0.142635	0.231243	-0.0807002	0.0271075	-0.0634742	-0.171253	0.0456755	-0.11484	0.00276192	0.0230877	0.0610174	0.0596103	0.150461	0.225729	-0.217046	0.224796	0.228562	0.024779	-0.181382	0.0752236	0.0291154	0.181986	0.102522	0.10925	-0.0566789	0.222836	-0.0087132	-0.0765017	0.000670496	-0.141969	-0.141104	-0.156765	-0.171237	0.0337553	-0.11419	-0.0348645
	IC31	0.076359	-0.0091075	0.00999184	0.097223	-0.0456391	0.144115	-0.0487874	0.000736498	0.0566117	0.0724525	0	0.202052	0.28975	0.111321	-0.0656431	-0.133202	-0.0102885	-0.0671954	-0.164333	-0.0936582	-0.04488	-0.0702897	0.0479409	0.123893	0.23555	-0.218694	0.0347199	0.202692	0.227992	-0.0643451	0.0329426	0.192225	0.113426	0.21327	-0.0726435	0.0248627	0.210094	0.0636828	-0.0756952	-0.077629	-0.327059	-0.286125	-0.0773309	-0.33129	0.0879674	-0.109254	-0.0468381
	IC42	0.0578996	0.0252639	0.0639889	0.0700044	-0.00841687	0.119614	0.136357	0.103867	0.0704781	0.142635	0.202052	0	0.293937	0.0663782	-0.00915932	-0.0559416	-0.0960448	-0.025578	-0.015681	-0.0266267	0.0234089	0.0135327	0.142252	0.0893744	0.210448	-0.205289	0.131376	0.161114	-0.0175423	-0.154207	0.0378302	0.022164	0.0694273	0.125334	0.00372356	-0.0677068	0.219896	-0.104427	-0.0994785	-0.02464	-0.222168	-0.172243	-0.0236659	-0.264593	0.180014	-0.100007	-0.0829924
	IC50	0.1412	0.026704	0.0776488	0.206539	0.0726926	0.301412	0.0931766	0.09475	0.0815584	0.231243	0.28975	0.293937	0	-0.006444	-0.0693759	-0.159408	-0.159102	-0.0617685	-0.170207	-0.0939556	-0.0469815	-0.0046866	0.107425	0.265871	0.441567	-0.334285	0.252601	0.37034	0.11	-0.256382	0.0899686	0.114443	0.254314	0.255253	0.0340148	0.0157004	0.4265	-0.029452	-0.131064	-0.00462303	-0.381062	-0.315165	-0.143192	-0.381701	0.148663	-0.21016	-0.0962312
	IC70	0.000496318	0.0233475	0.0114636	-0.0230346	-0.170861	-0.0470494	-0.0220693	-0.0107535	0.0878215	-0.0807002	0.111321	0.0663782	-0.006444	0	-0.0479034	0.0126523	0.127648	-0.0904288	-0.0596266	-0.102536	-0.025325	-0.0513022	0.0821909	-0.0696775	0.0169164	-0.0273624	-0.138766	-0.0478957	-0.00660963	0.00632228	0.0275194	0.0533387	-0.0362824	0.0601611	-0.0891769	0.134912	-0.00594602	0.0545494	-0.0481854	-0.108893	-0.0863353	-0.0829211	-0.0237191	-0.0784261	0.0704593	-0.140069	0.0646159
VIS	IC20	-0.0577136	-0.0173443	0.0107543	-0.0149373	0.0801946	0.00667251	-0.000300031	0.0481533	0.0179546	0.0271075	-0.0656431	-0.00915932	-0.0693759	-0.0479034	0	0.171923	0.0201246	0.226536	-0.00120204	0.300218	0.137928	0.193604	-0.030947	-0.0203354	-0.0717282	0.077558	0.00423462	-0.0141035	-0.0798515	-0.0748005	0.0321245	-0.149783	-0.0234917	-0.0682501	0.0725379	-0.067937	-0.0700414	-0.023545	-0.0219012	0.030877	0.0632319	0.104447	-0.00981286	0.0622303	-0.0710619	-0.0183128	0.0908867
	IC35	-0.0465541	0.077651	0.0232374	-0.0692021	-0.00168236	-0.0717094	0.0516267	0.0474903	0.00637442	-0.0634742	-0.133202	-0.0559416	-0.159408	0.0126523	0.171923	0	0.0432388	0.147852	0.123515	0.0973332	0.156347	0.172626	0.0105725	-0.113305	-0.155586	0.0844038	-0.044963	-0.151153	-0.157604	-0.0142274	-0.0182458	-0.103893	-0.0497356	-0.124137	0.0654576	-0.0359905	-0.0999459	-0.0469588	0.0484461	0.00279033	0.155249	0.136546	0.0646787	0.0755721	-0.0193133	0.000403702	0.123098
	IC41	-0.0745457	-0.0473791	-0.0463102	-0.078746	-0.0355414	-0.107954	-0.0972105	-0.0481501	-0.0181009	-0.171253	-0.0102885	-0.0960448	-0.159102	0.127648	0.0201246	0.0432388	0	-0.0245441	-0.0129645	-0.0117658	-0.0609683	-0.0518504	0.0493677	-0.11506	-0.116881	0.140437	-0.207396	-0.147231	0.0570767	0.158935	-0.057248	0.0544868	-0.0691099	-0.0688044	-0.0989559	0.164093	-0.174655	0.0819517	-0.027369	-0.131677	0.0465215	0.00534009	0.00253128	0.087142	-0.0916305	-0.123095	0.0518617
	IC54	0.0193996	-0.024272	0.0430653	-0.0382242	0.101022	0.0319735	-0.0092502	0.0136544	0.00787745	0.0456755	-0.0671954	-0.025578	-0.0617685	-0.0904288	0.226536	0.147852	-0.0245441	0	0.125618	0.24584	0.1649	0.310452	-0.00292695	0.0586559	-0.0620221	0.024962	0.0308506	-0.0408915	-0.0466519	-0.065438	0.0473838	-0.0950523	-0.0376023	-0.0855633	0.0531451	-0.0992945	-0.0254265	-0.00735315	0.102979	0.148704	0.128869	0.057928	0.043579	0.0473946	-0.0420575	0.037901	0.0266666
	IC61	0.0193438	0.0152191	-0.00625891	-0.117141	0.00333324	-0.0873159	-0.00234711	0.00688536	-0.0198465	-0.11484	-0.164333	-0.015681	-0.170207	-0.0596266	-0.00120204	0.123515	-0.0129645	0.125618	0	0.00596992	0.0470956	0.0834441	0.085979	-0.0856896	-0.176202	0.0733548	-0.0510675	-0.107745	-0.194045	0.0787764	-0.0757668	-0.112949	-0.153943	-0.140736	-0.017079	-0.117203	-0.140605	-0.151503	0.0934764	0.14136	0.275586	0.172587	0.188263	0.156109	0.0650745	0.174758	-0.0428169
	IC63	-0.0415479	-0.00720301	-0.030169	-0.0413518	0.076738	-0.00777135	-0.0179459	0.0390506	0.000473167	0.00276192	-0.0936582	-0.0266267	-0.0939556	-0.102536	0.300218	0.0973332	-0.0117658	0.24584	0.00596992	0	0.169361	0.209015	-0.0668035	0.0302034	-0.0674627	0.117	0.0118044	-0.0631938	-0.0337672	-0.061696	0.0118869	-0.120616	-0.0218251	-0.0674256	0.0506356	-0.0927615	-0.0701696	-0.0796549	0.0118209	0.052382	0.0832474	0.128262	-0.012966	0.0782499	-0.0871247	0.0489079	-0.00109162
	IC73	-0.040853	0.000236782	0.0118198	-0.0541952	0.00179325	-0.00795137	0.00393543	-0.0111589	-0.00859752	0.0230877	-0.04488	0.0234089	-0.0469815	-0.025325	0.137928	0.156347	-0.0609683	0.1649	0.0470956	0.169361	0	0.148838	0.00294383	-0.0140348	-0.0297591	-0.00384222	0.00248084	-0.0333432	-0.0805334	-0.108537	0.0399109	-0.124997	-0.0108431	-0.0344074	0.0425458	-0.141041	-0.0492623	-0.0873336	0.0207379	0.0131335	0.0490948	0.0547375	0.0588599	0.00947192	0.0087532	0.0240741	0.0288384
	IC78	0.0198611	0.00794755	0.00885516	0.0474353	0.0915623	0.00403204	0.00834107	0.0299997	0.00321373	0.0610174	-0.0702897	0.0135327	-0.0046866	-0.0513022	0.193604	0.172626	-0.0518504	0.310452	0.0834441	0.209015	0.148838	0	0.0273447	0.0203523	-0.0291174	0.0100727	0.0606224	-0.000294837	-0.0758975	-0.0903965	0.0126162	-0.0811652	0.0419481	-0.0329418	0.0588582	-0.0780881	0.0265606	-0.0327687	0.00102432	0.0763895	0.0535894	0.0532671	-0.0166125	-0.00162621	-0.0471776	-0.0407084	0.0512029
	IC86	0.0399541	0.000462301	0.0776731	-0.0120936	-0.0759264	-0.0139489	0.0612823	0.0196421	-0.00549509	0.0596103	0.0479409	0.142252	0.107425	0.0821909	-0.030947	0.0105725	0.0493677	-0.00292695	0.085979	-0.0668035	0.00294383	0.0273447	0	-0.0108793	0.0272535	-0.0943162	-0.0119078	0.0472487	-0.0634327	-0.00368867	0.052689	-0.000211806	0.012527	0.0554501	-0.101845	-0.0472441	0.105913	-0.052282	-0.0242697	-0.00739645	-0.0527876	-0.180774	0.090586	-0.129931	0.155246	-0.0748759	-0.0877928
CEN	IC19	0.132298	0.0163671	0.0822187	0.171922	0.0974638	0.143386	-0.030665	-0.000952701	0.023659	0.150461	0.123893	0.0893744	0.265871	-0.0696775	-0.0203354	-0.113305	-0.11506	0.0586559	-0.0856896	0.0302034	-0.0140348	0.0203523	-0.0108793	0	0.221331	-0.146162	0.12567	0.226756	0.067143	-0.215563	0.165047	0.0486484	0.125362	0.174684	0.126467	-0.0227181	0.258686	0.0162491	-0.0665424	0.0916412	-0.21192	-0.169685	-0.0878107	-0.217902	0.0395396	-0.0756706	-0.0825202
	IC22	0.131887	0.0154243	0.0512792	0.210093	0.0700909	0.315954	0.0536823	0.0811205	0.135778	0.225729	0.23555	0.210448	0.441567	0.0169164	-0.0717282	-0.155586	-0.116881	-0.0620221	-0.176202	-0.0674627	-0.0297591	-0.0291174	0.0272535	0.221331	0	-0.268923	0.226517	0.336885	0.118532	-0.217918	0.0666812	0.11732	0.179195	0.209436	0.0391007	0.0141692	0.335415	-0.0235399	-0.130114	-0.0285984	-0.298805	-0.26512	-0.159956	-0.30432	0.0643029	-0.158247	-0.0595198
	IC26	-0.175825	-0.0715739	-0.0840752	-0.168511	-0.0363193	-0.215794	-0.0682222	-0.102389	-0.105093	-0.217046	-0.218694	-0.205289	-0.334285	-0.0273624	0.077558	0.0844038	0.140437	0.024962	0.0733548	0.117	-0.00384222	0.0100727	-0.0943162	-0.146162	-0.268923	0	-0.170075	-0.244333	-0.0268826	0.169173	-0.0694777	-0.102595	-0.156426	-0.151603	-0.0246113	0.010924	-0.281935	0.0545205	0.0903222	-0.0572803	0.220933	0.224388	0.105341	0.242342	-0.165304	0.110875	0.0877501
	IC30	0.0860702	-0.0113039	0.0599538	0.150866	0.20958	0.153865	0.147872	0.120951	0.0716068	0.224796	0.0347199	0.131376	0.252601	-0.138766	0.00423462	-0.044963	-0.207396	0.0308506	-0.0510675	0.0118044	0.00248084	0.0606224	-0.0119078	0.12567	0.226517	-0.170075	0	0.19097	0.00348156	-0.159106	0.0252588	-0.0267567	0.157107	-0.019443	0.0579123	-0.0683633	0.204482	-0.0548645	0.0303905	0.0731541	-0.0933248	-0.0446224	-0.0761591	-0.122546	0.068608	-0.0370625	-0.073616
	IC33	0.198462	0.0354653	0.0326306	0.192328	0.100364	0.280665	0.0284162	0.0752291	0.0804863	0.228562	0.202692	0.161114	0.37034	-0.0478957	-0.0141035	-0.151153	-0.147231	-0.0408915	-0.107745	-0.0631938	-0.0333432	-0.000294837	0.0472487	0.226756	0.336885	-0.244333	0.19097	0	0.101713	-0.158011	0.0455726	0.100149	0.163948	0.193132	0.0205454	-0.0162195	0.308177	-0.0399755	-0.088434	0.0159382	-0.239171	-0.200029	-0.145899	-0.223468	0.0613295	-0.100044	-0.0887668
	IC64	0.0051018	-0.0541872	-0.0612515	0.0300438	0.0162017	0.0520295	-0.069074	-0.0510226	0.0202833	0.024779	0.227992	-0.0175423	0.11	-0.00660963	-0.0798515	-0.157604	0.0570767	-0.0466519	-0.194045	-0.0337672	-0.0805334	-0.0758975	-0.0634327	0.067143	0.118532	-0.0268826	0.00348156	0.101713	0	0.10759	-0.0796857	0.204796	0.0643053	0.121235	-0.153658	0.123025	0.0698685	0.121148	-0.00483359	-0.105463	-0.253538	-0.183654	-0.0923697	-0.140782	-0.107352	-0.04316	-0.0600676
	IC67	-0.0661517	-0.0690438	-0.100004	-0.136028	-0.0802674	-0.173955	-0.0705511	-0.092286	-0.0699908	-0.181382	-0.0643451	-0.154207	-0.256382	0.00632228	-0.0748005	-0.0142274	0.158935	-0.065438	0.0787764	-0.061696	-0.108537	-0.0903965	-0.00368867	-0.215563	-0.217918	0.169173	-0.159106	-0.158011	0.10759	0	-0.145238	0.0801595	-0.147737	-0.078146	-0.232863	0.016935	-0.270886	0.0680604	0.0924547	-0.0836856	0.161783	0.0639397	0.0831527	0.216166	-0.0720519	0.193926	-0.0201689
	IC77	0.0466992	0.0317316	0.149968	0.0435507	-0.0286078	0.0151716	0.0250343	-0.0148779	0.00955662	0.0752236	0.0329426	0.0378302	0.0899686	0.0275194	0.0321245	-0.0182458	-0.057248	0.0473838	-0.0757668	0.0118869	0.0399109	0.0126162	0.052689	0.165047	0.0666812	-0.0694777	0.0252588	0.0455726	-0.0796857	-0.145238	0	-0.140384	0.0611472	0.0825007	0.0916804	-0.0241885	0.163904	0.0632114	0.014138	0.0808751	-0.0506049	-0.115279	-0.0100236	-0.132802	0.0899087	-0.0831845	0.00461511
	IC82	0.0624566	0.00634891	-0.0653916	0.0913001	-0.0208688	0.0822538	-0.0479151	0.0125067	0.054908	0.0291154	0.192225	0.022164	0.114443	0.0533387	-0.149783	-0.103893	0.0544868	-0.0950523	-0.112949	-0.120616	-0.124997	-0.0811652	-0.000211806	0.0486484	0.11732	-0.102595	-0.0267567	0.100149	0.204796	0.0801595	-0.140384	0	0.0273608	0.0906588	-0.0738012	0.185915	0.0477078	0.0804123	-0.116022	-0.113569	-0.209133	-0.116921	-0.145106	-0.117139	-0.0316966	-0.0324041	-0.0225436
	IC85	0.0235789	0.0384351	0.0054304	0.140427	0.0510389	0.137015	0.0527088	0.0238044	-0.0374558	0.181986	0.113426	0.0694273	0.254314	-0.0362824	-0.0234917	-0.0497356	-0.0691099	-0.0376023	-0.153943	-0.0218251	-0.0108431	0.0419481	0.012527	0.125362	0.179195	-0.156426	0.157107	0.163948	0.0643053	-0.147737	0.0611472	0.0273608	0	0.0950963	0.0284006	0.0292957	0.223863	0.0216769	-0.015675	-0.0614041	-0.193118	-0.187103	-0.069022	-0.200644	0.013559	-0.172716	-0.0145329
	IC88	0.0628328	0.0222657	0.00290621	0.115411	-0.110508	0.101958	-0.0299986	-0.00478145	0.0575743	0.102522	0.21327	0.125334	0.255253	0.0601611	-0.0682501	-0.124137	-0.0688044	-0.0855633	-0.140736	-0.0674256	-0.0344074	-0.0329418	0.0554501	0.174684	0.209436	-0.151603	-0.019443	0.193132	0.121235	-0.078146	0.0825007	0.0906588	0.0950963	0	-0.0391102	0.0024274	0.219787	0.0323371	-0.118719	-0.12199	-0.280175	-0.299684	-0.0703887	-0.24702	0.0706107	-0.161602	-0.0470502
	IC89	0.049977	0.0651668	0.0560561	0.0770807	0.10229	0.088999	0.0217548	0.0436034	0.00840022	0.10925	-0.0726435	0.00372356	0.0340148	-0.0891769	0.0725379	0.0654576	-0.0989559	0.0531451	-0.017079	0.0506356	0.0425458	0.0588582	-0.101845	0.126467	0.0391007	-0.0246113	0.0579123	0.0205454	-0.153658	-0.232863	0.0916804	-0.0738012	0.0284006	-0.0391102	0	-0.0154416	0.0425779	-0.0141388	-0.0572131	0.103767	0.0132413	0.12934	-0.0744228	0.0194913	-0.108358	0.0355199	0.0896886
	IC90	0.0120845	0.0239553	-0.0637371	0.0883522	0.0102396	-0.00782417	-0.0564311	0.0142528	0.00920159	-0.0566789	0.0248627	-0.0677068	0.0157004	0.134912	-0.067937	-0.0359905	0.164093	-0.0992945	-0.117203	-0.0927615	-0.141041	-0.0780881	-0.0472441	-0.0227181	0.0141692	0.010924	-0.0683633	-0.0162195	0.123025	0.016935	-0.0241885	0.185915	0.0292957	0.0024274	-0.0154416	0	-0.0650964	0.181851	-0.0669282	-0.155412	-0.123651	0.0011616	-0.197133	0.0341109	-0.104419	-0.187473	0.0568692
	IC93	0.135931	0.0613214	0.142054	0.172597	0.0127756	0.191531	0.11005	0.0615319	0.0666431	0.222836	0.210094	0.219896	0.4265	-0.00594602	-0.0700414	-0.0999459	-0.174655	-0.0254265	-0.140605	-0.0701696	-0.0492623	0.0265606	0.105913	0.258686	0.335415	-0.281935	0.204482	0.308177	0.0698685	-0.270886	0.163904	0.0477078	0.223863	0.219787	0.0425779	-0.0650964	0	-0.00499027	-0.0587102	0.0602664	-0.270961	-0.293924	-0.0609652	-0.409822	0.172919	-0.160756	-0.0607086
	IC97	-0.00255047	0.00971321	0.0621438	0.0203104	0.00366642	-0.0475241	-0.0893938	-0.029896	-0.0274868	-0.0087132	0.0636828	-0.104427	-0.029452	0.0545494	-0.023545	-0.0469588	0.0819517	-0.00735315	-0.151503	-0.0796549	-0.0873336	-0.0327687	-0.052282	0.0162491	-0.0235399	0.0545205	-0.0548645	-0.0399755	0.121148	0.0680604	0.0632114	0.0804123	0.0216769	0.0323371	-0.0141388	0.181851	-0.00499027	0	0.0345417	-0.0412139	-0.0701822	-0.091312	-0.124983	-0.0112411	-0.160019	-0.0889017	0.061022
DMN	IC11	-0.0419639	-0.0117427	0.00136025	-0.119065	-0.016548	-0.117802	-0.00560201	-0.0648111	-0.0657742	-0.0765017	-0.0756952	-0.0994785	-0.131064	-0.0481854	-0.0219012	0.0484461	-0.027369	0.102979	0.0934764	0.0118209	0.0207379	0.00102432	-0.0242697	-0.0665424	-0.130114	0.0903222	0.0303905	-0.088434	-0.00483359	0.0924547	0.014138	-0.116022	-0.015675	-0.118719	-0.0572131	-0.0669282	-0.0587102	0.0345417	0	0.108214	0.19827	0.0598254	0.213593	0.099058	0.000351602	0.142227	-0.0304724
	IC21	0.111506	-0.014813	0.128056	0.000848901	0.111329	0.0385882	0.0553525	0.0389474	0.0290343	0.000670496	-0.077629	-0.02464	-0.00462303	-0.108893	0.030877	0.00279033	-0.131677	0.148704	0.14136	0.052382	0.0131335	0.0763895	-0.00739645	0.0916412	-0.0285984	-0.0572803	0.0731541	0.0159382	-0.105463	-0.0836856	0.0808751	-0.113569	-0.0614041	-0.12199	0.103767	-0.155412	0.0602664	-0.0412139	0.108214	0	0.185537	0.135937	0.0317457	0.0663277	0.0407945	0.196545	-0.0364567
	IC29	-0.0650972	-0.0398926	-0.0304961	-0.166959	0.0219168	-0.16214	-0.0179651	-0.0441948	-0.0545776	-0.141969	-0.327059	-0.222168	-0.381062	-0.0863353	0.0632319	0.155249	0.0465215	0.128869	0.275586	0.0832474	0.0490948	0.0535894	-0.0527876	-0.21192	-0.298805	0.220933	-0.0933248	-0.239171	-0.253538	0.161783	-0.0506049	-0.209133	-0.193118	-0.280175	0.0132413	-0.123651	-0.270961	-0.0701822	0.19827	0.185537	0	0.352812	0.171497	0.422059	-0.0512545	0.250292	0.0517206
	IC49	-0.0475565	-0.0373121	-0.0633225	-0.11555	0.0770482	-0.10637	-0.0324757	0.00610523	-0.0566418	-0.141104	-0.286125	-0.172243	-0.315165	-0.0829211	0.104447	0.136546	0.00534009	0.057928	0.172587	0.128262	0.0547375	0.0532671	-0.180774	-0.169685	-0.26512	0.224388	-0.0446224	-0.200029	-0.183654	0.0639397	-0.115279	-0.116921	-0.187103	-0.299684	0.12934	0.0011616	-0.293924	-0.091312	0.0598254	0.135937	0.352812	0	0.0201354	0.448596	-0.0951538	0.231007	0.0612227
	IC55	-0.107032	-0.0443458	-0.0349595	-0.212854	-0.110195	-0.178657	-0.0251217	-0.138422	-0.13868	-0.156765	-0.0773309	-0.0236659	-0.143192	-0.0237191	-0.00981286	0.0646787	0.00253128	0.043579	0.188263	-0.012966	0.0588599	-0.0166125	0.090586	-0.0878107	-0.159956	0.105341	-0.0761591	-0.145899	-0.0923697	0.0831527	-0.0100236	-0.145106	-0.069022	-0.0703887	-0.0744228	-0.197133	-0.0609652	-0.124983	0.213593	0.0317457	0.171497	0.0201354	0	0.0322957	0.142334	0.1427	-0.00785673
	IC60	-0.0811992	-0.0684701	-0.0966569	-0.123478	0.0613646	-0.150076	-0.0640455	-0.03179	-0.0814447	-0.171237	-0.33129	-0.264593	-0.381701	-0.0784261	0.0622303	0.0755721	0.087142	0.0473946	0.156109	0.0782499	0.00947192	-0.00162621	-0.129931	-0.217902	-0.30432	0.242342	-0.122546	-0.223468	-0.140782	0.216166	-0.132802	-0.117139	-0.200644	-0.24702	0.0194913	0.0341109	-0.409822	-0.0112411	0.099058	0.0663277	0.422059	0.448596	0.0322957	0	-0.15175	0.213016	0.0468173
	IC76	0.0549589	-0.0181701	0.0650632	0.00842871	-0.0756564	0.00771807	0.0621303	-0.00703503	-0.000262281	0.0337553	0.0879674	0.180014	0.148663	0.0704593	-0.0710619	-0.0193133	-0.0916305	-0.0420575	0.0650745	-0.0871247	0.0087532	-0.0471776	0.155246	0.0395396	0.0643029	-0.165304	0.068608	0.0613295	-0.107352	-0.0720519	0.0899087	-0.0316966	0.013559	0.0706107	-0.108358	-0.104419	0.172919	-0.160019	0.000351602	0.0407945	-0.0512545	-0.0951538	0.142334	-0.15175	0	0.0122559	-0.0892404
	IC80	0.0071341	-0.0670766	-0.0144921	-0.122385	0.0320043	-0.0586138	0.00972075	-0.0338675	-0.0342926	-0.11419	-0.109254	-0.100007	-0.21016	-0.140069	-0.0183128	0.000403702	-0.123095	0.037901	0.174758	0.0489079	0.0240741	-0.0407084	-0.0748759	-0.0756706	-0.158247	0.110875	-0.0370625	-0.100044	-0.04316	0.193926	-0.0831845	-0.0324041	-0.172716	-0.161602	0.0355199	-0.187473	-0.160756	-0.0889017	0.142227	0.196545	0.250292	0.231007	0.1427	0.213016	0.0122559	0	-0.0428774
CB	IC7	-0.0703061	0.070177	0.00364067	0.0127436	-0.0102688	-0.00864551	-0.0610003	-0.00823417	-0.0100188	-0.0348645	-0.0468381	-0.0829924	-0.0962312	0.0646159	0.0908867	0.123098	0.0518617	0.0266666	-0.0428169	-0.00109162	0.0288384	0.0512029	-0.0877928	-0.0825202	-0.0595198	0.0877501	-0.073616	-0.0887668	-0.0600676	-0.0201689	0.00461511	-0.0225436	-0.0145329	-0.0470502	0.0896886	0.0568692	-0.0607086	0.061022	-0.0304724	-0.0364567	0.0517206	0.0612227	-0.00785673	0.0468173	-0.0892404	-0.0428774	0
The strength of the connection between the different independent components (IC) is shown in the cell. Each cell's horizontal and vertical axesl correspond to the sub-networks and independent components involved in the connection strength. Abbreviations: cerebellum network (CBN); basal ganglia network (BGN); default mode network (DMN); central executive network (CEN); sensorimotor network (SMN); …

## Sheet: Sheet2-State 2 Matrix
Functional Connectivity Matrix for State 2
Subnetwork		BG				AUD	SMN									VIS									CEN															DMN								CB
		IC6	IC58	IC99	IC100	IC15	IC1	IC4	IC8	IC9	IC17	IC31	IC42	IC50	IC70	IC20	IC35	IC41	IC54	IC61	IC63	IC73	IC78	IC86	IC19	IC22	IC26	IC30	IC33	IC64	IC67	IC77	IC82	IC85	IC88	IC89	IC90	IC93	IC97	IC11	IC21	IC29	IC49	IC55	IC60	IC76	IC80	IC7
BG	IC6	0	0.0978087	0.122046	0.204151	0.0783668	0.0897305	-0.0129483	0.0650569	0.0831179	0.0953128	0.037202	0.0425471	0.0781962	0.00733517	0.00224165	0.0478314	-0.0196639	0.0332885	0.0452128	0.0184601	-0.0358162	0.0810805	-0.0272428	0.0811385	0.0619682	-0.129849	0.0773725	0.08693	-0.0288778	-0.0772936	0.0316136	-0.0174579	-0.00600519	0.012571	0.0546273	-0.00423735	0.0832121	-0.0212657	0.0171345	0.0819669	0.0312708	0.0312093	-0.0916045	-0.0472071	0.0308165	0.0251819	-0.0196408
	IC58	0.0978087	0	0.141179	0.0491473	-0.0677604	-0.0702413	-0.0277475	-0.0230858	-0.0240791	0.0295824	-0.0802741	-0.0109715	-0.038638	-0.0660954	-0.00658119	0.0478557	-0.0513379	-0.0219405	0.0657651	-0.0379199	0.0125007	-0.00961445	-0.091139	0.00427921	-0.0202242	-0.054256	0.0307945	-0.0685273	-0.109349	-0.0703853	0.00814834	-0.0607888	-0.0113849	-0.0460911	0.0836567	-0.00976939	0.0129677	-0.000346698	-0.0142508	0.00496501	0.0933142	0.100373	0.00443738	0.0173109	0.00377178	0.0149433	0.121372
	IC99	0.122046	0.141179	0	0.0425766	-0.0590079	-0.0468708	-0.0406227	-0.0193903	-0.0191359	0.0143154	-0.0283222	-0.00527219	-0.047691	-0.0106973	-0.0503753	0.0352688	-0.0583159	0.0182524	0.0374255	-0.0336854	-0.023981	0.0132644	0.000775258	0.0654445	-0.0294691	-0.073269	0.000130297	-0.0681914	-0.0622218	-0.0783011	0.121407	-0.0946242	-0.0394394	-0.00547645	0.0589282	-0.0421629	0.061391	0.0458088	0.0485745	0.111843	0.0761416	0.0498731	0.0167523	-0.0293285	0.0352444	0.0408607	0.00942147
	IC100	0.204151	0.0491473	0.0425766	0	0.236151	0.214641	0.0761588	0.17943	0.201595	0.212267	0.1046	0.1443	0.247818	0.0420331	0.133673	0.0711843	0.0682617	0.0609177	-0.0989326	0.0939925	0.0311351	0.122831	-0.0314832	0.139772	0.208026	-0.212062	0.219598	0.178957	-0.0291158	-0.172056	0.0679736	-0.0354375	0.138272	-0.00423508	0.100924	0.0743816	0.180003	-0.0967843	-0.10552	0.0375886	-0.137721	-0.026372	-0.189126	-0.16608	0.0935229	-0.12363	0.0102198
AUD	IC15	0.0783668	-0.0677604	-0.0590079	0.236151	0	0.291497	0.136751	0.24519	0.228481	0.195639	0.154611	0.218022	0.319171	0.0222812	0.201733	0.0804432	0.114345	0.0862785	-0.106316	0.146735	0.0679129	0.183611	-0.0527346	0.131606	0.252119	-0.18159	0.347929	0.247572	-0.0297404	-0.213874	0.0227835	-0.0360161	0.13957	-0.0803615	0.11343	0.0351485	0.154696	-0.135639	-0.112977	0.0539275	-0.194202	-0.0183863	-0.128053	-0.205552	0.132201	-0.117153	0.00238229
SMN	IC1	0.0897305	-0.0702413	-0.0468708	0.214641	0.291497	0	0.183888	0.342704	0.361968	0.18825	0.21067	0.221282	0.300984	0.121134	0.195961	0.127174	0.105501	0.106788	-0.106394	0.191127	0.100435	0.194261	-0.0116489	0.0732757	0.276945	-0.201778	0.267442	0.231437	-0.0886613	-0.199709	-0.00145998	-0.0386609	0.110903	-0.0233059	0.106409	0.0118563	0.1408	-0.163828	-0.185581	0.0512858	-0.215727	-0.00925591	-0.191448	-0.198223	0.111977	-0.118243	-0.0299069
	IC4	-0.0129483	-0.0277475	-0.0406227	0.0761588	0.136751	0.183888	0	0.267529	0.216545	0.0635622	0.0645686	0.206555	0.13536	0.0801497	0.135254	0.0993385	0.0492096	0.0465531	-0.0734011	0.0915717	0.0711261	0.125962	0.0161326	-0.0090046	0.0855756	-0.0786108	0.194371	0.0869831	-0.0454837	-0.135648	-0.006961	-0.0496266	0.079445	-0.0502871	0.0253787	0.00140779	0.0712908	-0.0841959	-0.0809571	0.00180483	-0.134405	0.0199134	-0.0642258	-0.141785	0.0935997	-0.0607323	0.0329392
	IC8	0.0650569	-0.0230858	-0.0193903	0.17943	0.24519	0.342704	0.267529	0	0.443493	0.152101	0.176104	0.272825	0.260691	0.146344	0.236664	0.154994	0.0755204	0.0921612	-0.0950246	0.182811	0.105914	0.214437	0.0197802	0.0477569	0.188226	-0.17377	0.245456	0.166532	-0.103235	-0.227138	0.00231756	-0.0631359	0.113688	-0.0528088	0.0644174	0.0154205	0.140534	-0.158642	-0.15215	0.0379603	-0.192918	-0.0159973	-0.15211	-0.213726	0.144842	-0.117899	0.0127971
	IC9	0.0831179	-0.0240791	-0.0191359	0.201595	0.228481	0.361968	0.216545	0.443493	0	0.136492	0.159939	0.234083	0.229077	0.168878	0.212108	0.158951	0.0933024	0.0916355	-0.0871858	0.188021	0.122455	0.213485	-0.00869556	0.0675625	0.19876	-0.185262	0.247505	0.149877	-0.0947164	-0.217927	-0.0018131	-0.0593474	0.0879955	-0.0416081	0.0945033	-0.00289922	0.123867	-0.154786	-0.173128	0.0476354	-0.170887	0.00183751	-0.169118	-0.202606	0.115555	-0.0854157	-0.00442706
	IC17	0.0953128	0.0295824	0.0143154	0.212267	0.195639	0.18825	0.0635622	0.152101	0.136492	0	0.0814937	0.156588	0.20127	0.0183862	0.12849	0.0869487	0.00721366	0.0524587	-0.0888373	0.0548839	0.0488455	0.135491	-0.00185181	0.126315	0.173029	-0.205488	0.238084	0.16002	-0.0797531	-0.18587	0.0677127	0.0325896	0.112531	-0.00563494	0.13492	0.0172386	0.158253	-0.0797719	-0.110688	-0.0119823	-0.134249	-0.026542	-0.128885	-0.167936	0.0976769	-0.0967064	-0.0259323
	IC31	0.037202	-0.0802741	-0.0283222	0.1046	0.154611	0.21067	0.0645686	0.176104	0.159939	0.0814937	0	0.198733	0.224666	0.142966	0.106017	0.038775	0.154734	0.0423246	-0.106982	0.0831743	0.0105601	0.0776633	0.0530724	0.0525526	0.161019	-0.115281	0.15743	0.153525	0.00898593	-0.108611	0.0428669	0.0213877	0.121913	0.0101854	0.0174896	-0.00734744	0.116777	-0.0548366	-0.0893726	-0.00239137	-0.20351	-0.0885423	-0.0885915	-0.196307	0.0953999	-0.0988431	-0.0298456
	IC42	0.0425471	-0.0109715	-0.00527219	0.1443	0.218022	0.221282	0.206555	0.272825	0.234083	0.156588	0.198733	0	0.325625	0.092916	0.220473	0.143247	0.0910562	0.094127	-0.0668782	0.183462	0.149402	0.201712	0.00771144	0.0436479	0.199421	-0.221507	0.310107	0.176636	-0.0967604	-0.242382	0.0322921	-0.106326	0.110559	-0.0927392	0.0677228	-0.0364417	0.195309	-0.216782	-0.11504	0.019067	-0.195347	-0.0363589	-0.0520536	-0.283463	0.255776	-0.102722	0.00169877
	IC50	0.0781962	-0.038638	-0.047691	0.247818	0.319171	0.300984	0.13536	0.260691	0.229077	0.20127	0.224666	0.325625	0	0.0927176	0.199948	0.0774439	0.157873	0.101223	-0.120879	0.150623	0.118159	0.16477	0.022572	0.126672	0.358775	-0.227644	0.345352	0.232276	-0.0746897	-0.308215	0.0599021	-0.0505538	0.271722	-0.0397624	0.0664352	0.0385135	0.291042	-0.240937	-0.170848	0.0522505	-0.267894	-0.0955569	-0.104693	-0.346345	0.236924	-0.225722	-0.040639
	IC70	0.00733517	-0.0660954	-0.0106973	0.0420331	0.0222812	0.121134	0.0801497	0.146344	0.168878	0.0183862	0.142966	0.092916	0.0927176	0	0.0558675	0.0465683	0.0922146	-0.0023433	-0.0875814	0.0197495	0.0557081	0.04842	0.111168	-0.0478935	0.0733744	-0.0614998	0.0564353	0.0170908	-0.0910046	-0.0954396	0.0319358	-0.0379194	0.0587201	-0.0515417	-0.0324478	0.0443695	0.0361452	-0.0173079	-0.0473409	-0.0572005	-0.0723529	-0.0647928	-0.0566251	-0.0970772	0.103557	-0.105188	-0.00671487
VIS	IC20	0.00224165	-0.00658119	-0.0503753	0.133673	0.201733	0.195961	0.135254	0.236664	0.212108	0.12849	0.106017	0.220473	0.199948	0.0558675	0	0.166803	0.0714567	0.1262	-0.114651	0.266105	0.196245	0.213911	-0.0188023	0.044581	0.130515	-0.087792	0.195936	0.112913	-0.0733282	-0.196487	0.029342	-0.1403	0.071701	-0.0802393	0.119336	-0.0304371	0.107285	-0.1592	-0.106606	0.037831	-0.162374	0.0274096	-0.0802448	-0.167695	0.121799	-0.0857757	0.0671423
	IC35	0.0478314	0.0478557	0.0352688	0.0711843	0.0804432	0.127174	0.0993385	0.154994	0.158951	0.0869487	0.038775	0.143247	0.0774439	0.0465683	0.166803	0	-0.00257841	0.102588	0.00307013	0.121824	0.112335	0.238872	-0.00612532	-0.00829991	0.0535726	-0.0798851	0.11121	0.028678	-0.0874472	-0.129839	0.00926261	-0.0631286	-0.00130399	-0.0569959	0.0945865	-0.0229477	0.0767338	-0.0726249	-0.0766245	0.026997	-0.0160755	0.0294905	-0.0619525	-0.122089	0.0737294	-0.0292349	0.0916558
	IC41	-0.0196639	-0.0513379	-0.0583159	0.0682617	0.114345	0.105501	0.0492096	0.0755204	0.0933024	0.00721366	0.154734	0.0910562	0.157873	0.0922146	0.0714567	-0.00257841	0	-0.00408396	-0.17046	0.0509143	0.0350294	0.00527257	0.0662717	0.0206541	0.0625101	-0.0191002	0.0516987	0.00865959	-0.00437453	-0.0780156	0.0130871	0.00100747	0.125691	-0.0616866	0.0321654	0.107701	0.0294425	-0.00910019	-0.14235	-0.0887379	-0.137731	-0.0661925	-0.0334068	-0.0931304	0.0148109	-0.185114	0.0624126
	IC54	0.0332885	-0.0219405	0.0182524	0.0609177	0.0862785	0.106788	0.0465531	0.0921612	0.0916355	0.0524587	0.0423246	0.094127	0.101223	-0.0023433	0.1262	0.102588	-0.00408396	0	0.0261627	0.147752	0.0632856	0.167126	-0.00734312	0.077762	0.0813675	-0.0570012	0.0785354	0.0515701	-0.070794	-0.100937	0.0818481	-0.0528833	0.0323497	-0.00601326	0.0490434	-0.0776607	0.0891007	-0.0888303	0.0339658	0.0576221	0.0107159	-0.0454946	0.049082	-0.107929	0.0280515	-0.0259447	0.0107219
	IC61	0.0452128	0.0657651	0.0374255	-0.0989326	-0.106316	-0.106394	-0.0734011	-0.0950246	-0.0871858	-0.0888373	-0.106982	-0.0668782	-0.120879	-0.0875814	-0.114651	0.00307013	-0.17046	0.0261627	0	-0.108635	-0.00737008	0.00426016	-0.0139468	-0.0569656	-0.111324	0.0552222	-0.0821887	-0.0263608	-0.110168	0.0531305	-0.0771184	-0.0197425	-0.141021	-0.0361815	-0.0452081	-0.139142	-0.049264	-0.0577906	0.142425	0.165387	0.331269	0.139973	0.127263	0.0746796	0.0103069	0.173936	-0.0274213
	IC63	0.0184601	-0.0379199	-0.0336854	0.0939925	0.146735	0.191127	0.0915717	0.182811	0.188021	0.0548839	0.0831743	0.183462	0.150623	0.0197495	0.266105	0.121824	0.0509143	0.147752	-0.108635	0	0.118788	0.133273	-0.0730055	0.0630484	0.116362	-0.0549042	0.134551	0.0906426	-0.0163686	-0.168669	0.0294573	-0.083696	0.0197613	-0.00454674	0.0802779	-0.0461911	0.0866529	-0.158159	-0.095422	0.0548566	-0.121449	0.0197843	-0.0788268	-0.123375	0.0730901	-0.0195	0.0321369
	IC73	-0.0358162	0.0125007	-0.023981	0.0311351	0.0679129	0.100435	0.0711261	0.105914	0.122455	0.0488455	0.0105601	0.149402	0.118159	0.0557081	0.196245	0.112335	0.0350294	0.0632856	-0.00737008	0.118788	0	0.151208	0.0140093	-0.0195926	0.0819208	-0.0637977	0.114492	0.0255954	-0.101229	-0.174967	-0.00163714	-0.110885	0.0267417	-0.0465956	0.0411882	-0.0879663	0.0438868	-0.150735	-0.100363	-0.00362725	-0.0576594	0.0269658	0.0504223	-0.125322	0.0939551	-0.0375296	0.0559841
	IC78	0.0810805	-0.00961445	0.0132644	0.122831	0.183611	0.194261	0.125962	0.214437	0.213485	0.135491	0.0776633	0.201712	0.16477	0.04842	0.213911	0.238872	0.00527257	0.167126	0.00426016	0.133273	0.151208	0	0.00284017	0.0540612	0.125074	-0.136591	0.176872	0.130474	-0.0969136	-0.176705	0.00939562	-0.0759571	0.0405431	-0.0426137	0.0709125	-0.0278288	0.116061	-0.132867	-0.0705486	0.0851602	-0.0898492	0.00679427	-0.0545109	-0.188253	0.106043	-0.0443746	0.0106424
	IC86	-0.0272428	-0.091139	0.000775258	-0.0314832	-0.0527346	-0.0116489	0.0161326	0.0197802	-0.00869556	-0.00185181	0.0530724	0.00771144	0.022572	0.111168	-0.0188023	-0.00612532	0.0662717	-0.00734312	-0.0139468	-0.0730055	0.0140093	0.00284017	0	-0.0558004	-0.0310816	-0.0148767	-0.0577587	-0.0123921	-0.0270844	0.0734484	0.0264762	0.0304237	0.120287	0.0721969	-0.181787	0.0221173	0.067681	0.00428087	-0.00920069	-0.0881869	-0.0853974	-0.268622	0.103906	-0.0906098	0.0977984	-0.152383	-0.0265975
CEN	IC19	0.0811385	0.00427921	0.0654445	0.139772	0.131606	0.0732757	-0.0090046	0.0477569	0.0675625	0.126315	0.0525526	0.0436479	0.126672	-0.0478935	0.044581	-0.00829991	0.0206541	0.077762	-0.0569656	0.0630484	-0.0195926	0.0540612	-0.0558004	0	0.145732	-0.0890065	0.102532	0.0742157	0.0185452	-0.140804	0.133327	-0.00783432	0.0758939	0.0296737	0.141418	0.00510205	0.142113	-0.012537	-0.0687408	0.103212	-0.125548	-0.0303613	-0.052416	-0.116657	0.0389496	-0.039326	-0.0757854
	IC22	0.0619682	-0.0202242	-0.0294691	0.208026	0.252119	0.276945	0.0855756	0.188226	0.19876	0.173029	0.161019	0.199421	0.358775	0.0733744	0.130515	0.0535726	0.0625101	0.0813675	-0.111324	0.116362	0.0819208	0.125074	-0.0310816	0.145732	0	-0.193888	0.275949	0.176556	-0.0785768	-0.234766	0.0620243	-0.0297945	0.168296	-0.0262927	0.0948225	0.0386107	0.237431	-0.176835	-0.135022	0.0454918	-0.199201	-0.0583373	-0.108291	-0.240698	0.154648	-0.144967	-0.0254072
	IC26	-0.129849	-0.054256	-0.073269	-0.212062	-0.18159	-0.201778	-0.0786108	-0.17377	-0.185262	-0.205488	-0.115281	-0.221507	-0.227644	-0.0614998	-0.087792	-0.0798851	-0.0191002	-0.0570012	0.0552222	-0.0549042	-0.0637977	-0.136591	-0.0148767	-0.0890065	-0.193888	0	-0.229766	-0.124054	0.103525	0.200572	-0.0532213	0.00555243	-0.114461	0.0417438	-0.0762978	-0.0321953	-0.183269	0.0981828	0.0685389	-0.0398803	0.121506	0.0439951	0.0944661	0.219772	-0.161001	0.0882395	0.01051
	IC30	0.0773725	0.0307945	0.000130297	0.219598	0.347929	0.267442	0.194371	0.245456	0.247505	0.238084	0.15743	0.310107	0.345352	0.0564353	0.195936	0.11121	0.0516987	0.0785354	-0.0821887	0.134551	0.114492	0.176872	-0.0577587	0.102532	0.275949	-0.229766	0	0.212141	-0.124182	-0.297281	0.0386826	-0.106021	0.158046	-0.143183	0.131562	-0.017012	0.235842	-0.18631	-0.092639	0.0788991	-0.157999	0.00334903	-0.112658	-0.280731	0.207954	-0.106583	0.00224704
	IC33	0.08693	-0.0685273	-0.0681914	0.178957	0.247572	0.231437	0.0869831	0.166532	0.149877	0.16002	0.153525	0.176636	0.232276	0.0170908	0.112913	0.028678	0.00865959	0.0515701	-0.0263608	0.0906426	0.0255954	0.130474	-0.0123921	0.0742157	0.176556	-0.124054	0.212141	0	0.0233027	-0.0916293	-0.0043192	0.0207646	0.0678043	0.0242933	-0.00809432	-0.0160348	0.151977	-0.0997022	-0.0248788	0.0497736	-0.13002	-0.0447426	-0.0941901	-0.132209	0.0846636	-0.0638405	-0.0979103
	IC64	-0.0288778	-0.109349	-0.0622218	-0.0291158	-0.0297404	-0.0886613	-0.0454837	-0.103235	-0.0947164	-0.0797531	0.00898593	-0.0967604	-0.0746897	-0.0910046	-0.0733282	-0.0874472	-0.00437453	-0.070794	-0.110168	-0.0163686	-0.101229	-0.0969136	-0.0270844	0.0185452	-0.0785768	0.103525	-0.124182	0.0233027	0	0.199531	-0.0907904	0.123661	0.0191557	0.0932734	-0.146878	0.0378507	-0.0704062	0.126092	0.0630007	-0.0526917	-0.11048	-0.0879573	-0.044007	0.100282	-0.136985	0.081868	-0.0241544
	IC67	-0.0772936	-0.0703853	-0.0783011	-0.172056	-0.213874	-0.199709	-0.135648	-0.227138	-0.217927	-0.18587	-0.108611	-0.242382	-0.308215	-0.0954396	-0.196487	-0.129839	-0.0780156	-0.100937	0.0531305	-0.168669	-0.174967	-0.176705	0.0734484	-0.140804	-0.234766	0.200572	-0.297281	-0.0916293	0.199531	0	-0.162258	0.173536	-0.149879	0.111631	-0.246729	-0.0160555	-0.233571	0.24626	0.145927	-0.101504	0.153864	-0.0847414	0.0723498	0.303384	-0.212771	0.151555	-0.0115827
	IC77	0.0316136	0.00814834	0.121407	0.0679736	0.0227835	-0.00145998	-0.006961	0.00231756	-0.0018131	0.0677127	0.0428669	0.0322921	0.0599021	0.0319358	0.029342	0.00926261	0.0130871	0.0818481	-0.0771184	0.0294573	-0.00163714	0.00939562	0.0264762	0.133327	0.0620243	-0.0532213	0.0386826	-0.0043192	-0.0907904	-0.162258	0	-0.136193	0.0503306	0.0122525	0.0992995	-0.00476629	0.193442	0.038427	0.010475	0.0275631	-0.041346	-0.0337588	0.0179503	-0.113852	0.0886339	-0.0988462	-0.00326781
	IC82	-0.0174579	-0.0607888	-0.0946242	-0.0354375	-0.0360161	-0.0386609	-0.0496266	-0.0631359	-0.0593474	0.0325896	0.0213877	-0.106326	-0.0505538	-0.0379194	-0.1403	-0.0631286	0.00100747	-0.0528833	-0.0197425	-0.083696	-0.110885	-0.0759571	0.0304237	-0.00783432	-0.0297945	0.00555243	-0.106021	0.0207646	0.123661	0.173536	-0.136193	0	0.00899991	0.060121	-0.0547924	0.109029	-0.0681248	0.124627	-0.0260435	-0.0885079	-0.0572496	-0.0790346	-0.0832144	0.0799535	-0.08862	0.0403893	-0.0922685
	IC85	-0.00600519	-0.0113849	-0.0394394	0.138272	0.13957	0.110903	0.079445	0.113688	0.0879955	0.112531	0.121913	0.110559	0.271722	0.0587201	0.071701	-0.00130399	0.125691	0.0323497	-0.141021	0.0197613	0.0267417	0.0405431	0.120287	0.0758939	0.168296	-0.114461	0.158046	0.0678043	0.0191557	-0.149879	0.0503306	0.00899991	0	0.0347153	-0.0323714	0.123163	0.225105	-0.107346	-0.0681733	-0.0580657	-0.246681	-0.193693	-0.04321	-0.252536	0.11543	-0.301677	0.00111582
	IC88	0.012571	-0.0460911	-0.00547645	-0.00423508	-0.0803615	-0.0233059	-0.0502871	-0.0528088	-0.0416081	-0.00563494	0.0101854	-0.0927392	-0.0397624	-0.0515417	-0.0802393	-0.0569959	-0.0616866	-0.00601326	-0.0361815	-0.00454674	-0.0465956	-0.0426137	0.0721969	0.0296737	-0.0262927	0.0417438	-0.143183	0.0242933	0.0932734	0.111631	0.0122525	0.060121	0.0347153	0	-0.0940374	-0.0244422	0.0138179	0.0492555	-0.00603807	-0.0647412	-0.0439532	-0.164245	-0.00160667	-0.0186988	-0.0339255	-0.0015672	-0.0453147
	IC89	0.0546273	0.0836567	0.0589282	0.100924	0.11343	0.106409	0.0253787	0.0644174	0.0945033	0.13492	0.0174896	0.0677228	0.0664352	-0.0324478	0.119336	0.0945865	0.0321654	0.0490434	-0.0452081	0.0802779	0.0411882	0.0709125	-0.181787	0.141418	0.0948225	-0.0762978	0.131562	-0.00809432	-0.146878	-0.246729	0.0992995	-0.0547924	-0.0323714	-0.0940374	0	0.0407704	0.0385825	-0.0486839	-0.119226	0.0684433	-0.0277791	0.223384	-0.104544	-0.040101	-0.0118075	-0.0174159	0.041739
	IC90	-0.00423735	-0.00976939	-0.0421629	0.0743816	0.0351485	0.0118563	0.00140779	0.0154205	-0.00289922	0.0172386	-0.00734744	-0.0364417	0.0385135	0.0443695	-0.0304371	-0.0229477	0.107701	-0.0776607	-0.139142	-0.0461911	-0.0879663	-0.0278288	0.0221173	0.00510205	0.0386107	-0.0321953	-0.017012	-0.0160348	0.0378507	-0.0160555	-0.00476629	0.109029	0.123163	-0.0244422	0.0407704	0	-0.000773428	0.109842	-0.0629796	-0.102301	-0.140049	-0.0442585	-0.154242	0.0535411	-0.0270527	-0.253363	-0.0265997
	IC93	0.0832121	0.0129677	0.061391	0.180003	0.154696	0.1408	0.0712908	0.140534	0.123867	0.158253	0.116777	0.195309	0.291042	0.0361452	0.107285	0.0767338	0.0294425	0.0891007	-0.049264	0.0866529	0.0438868	0.116061	0.067681	0.142113	0.237431	-0.183269	0.235842	0.151977	-0.0704062	-0.233571	0.193442	-0.0681248	0.225105	0.0138179	0.0385825	-0.000773428	0	-0.141253	-0.0372936	0.0857957	-0.144437	-0.133847	-0.00932398	-0.397586	0.267405	-0.171865	-0.0122672
	IC97	-0.0212657	-0.000346698	0.0458088	-0.0967843	-0.135639	-0.163828	-0.0841959	-0.158642	-0.154786	-0.0797719	-0.0548366	-0.216782	-0.240937	-0.0173079	-0.1592	-0.0726249	-0.00910019	-0.0888303	-0.0577906	-0.158159	-0.150735	-0.132867	0.00428087	-0.012537	-0.176835	0.0981828	-0.18631	-0.0997022	0.126092	0.24626	0.038427	0.124627	-0.107346	0.0492555	-0.0486839	0.109842	-0.141253	0	0.108383	-0.0801171	0.0395986	-0.0457968	-0.0656057	0.24429	-0.170837	0.0478488	0.00761707
DMN	IC11	0.0171345	-0.0142508	0.0485745	-0.10552	-0.112977	-0.185581	-0.0809571	-0.15215	-0.173128	-0.110688	-0.0893726	-0.11504	-0.170848	-0.0473409	-0.106606	-0.0766245	-0.14235	0.0339658	0.142425	-0.095422	-0.100363	-0.0705486	-0.00920069	-0.0687408	-0.135022	0.0685389	-0.092639	-0.0248788	0.0630007	0.145927	0.010475	-0.0260435	-0.0681733	-0.00603807	-0.119226	-0.0629796	-0.0372936	0.108383	0	0.0920414	0.241425	0.0403229	0.0986701	0.105166	-0.0360258	0.138405	-0.0278074
	IC21	0.0819669	0.00496501	0.111843	0.0375886	0.0539275	0.0512858	0.00180483	0.0379603	0.0476354	-0.0119823	-0.00239137	0.019067	0.0522505	-0.0572005	0.037831	0.026997	-0.0887379	0.0576221	0.165387	0.0548566	-0.00362725	0.0851602	-0.0881869	0.103212	0.0454918	-0.0398803	0.0788991	0.0497736	-0.0526917	-0.101504	0.0275631	-0.0885079	-0.0580657	-0.0647412	0.0684433	-0.102301	0.0857957	-0.0801171	0.0920414	0	0.146856	0.23064	-0.0492092	-0.0427557	0.0363004	0.154797	-0.0665571
	IC29	0.0312708	0.0933142	0.0761416	-0.137721	-0.194202	-0.215727	-0.134405	-0.192918	-0.170887	-0.134249	-0.20351	-0.195347	-0.267894	-0.0723529	-0.162374	-0.0160755	-0.137731	0.0107159	0.331269	-0.121449	-0.0576594	-0.0898492	-0.0853974	-0.125548	-0.199201	0.121506	-0.157999	-0.13002	-0.11048	0.153864	-0.041346	-0.0572496	-0.246681	-0.0439532	-0.0277791	-0.140049	-0.144437	0.0395986	0.241425	0.146856	0	0.213643	0.128004	0.259916	-0.103819	0.224586	0.0178074
	IC49	0.0312093	0.100373	0.0498731	-0.026372	-0.0183863	-0.00925591	0.0199134	-0.0159973	0.00183751	-0.026542	-0.0885423	-0.0363589	-0.0955569	-0.0647928	0.0274096	0.0294905	-0.0661925	-0.0454946	0.139973	0.0197843	0.0269658	0.00679427	-0.268622	-0.0303613	-0.0583373	0.0439951	0.00334903	-0.0447426	-0.0879573	-0.0847414	-0.0337588	-0.0790346	-0.193693	-0.164245	0.223384	-0.0442585	-0.133847	-0.0457968	0.0403229	0.23064	0.213643	0	-0.0413577	0.146918	-0.0826855	0.203934	0.0157786
	IC55	-0.0916045	0.00443738	0.0167523	-0.189126	-0.128053	-0.191448	-0.0642258	-0.15211	-0.169118	-0.128885	-0.0885915	-0.0520536	-0.104693	-0.0566251	-0.0802448	-0.0619525	-0.0334068	0.049082	0.127263	-0.0788268	0.0504223	-0.0545109	0.103906	-0.052416	-0.108291	0.0944661	-0.112658	-0.0941901	-0.044007	0.0723498	0.0179503	-0.0832144	-0.04321	-0.00160667	-0.104544	-0.154242	-0.00932398	-0.0656057	0.0986701	-0.0492092	0.128004	-0.0413577	0	-0.032925	0.0461785	0.0473092	0.0610023
	IC60	-0.0472071	0.0173109	-0.0293285	-0.16608	-0.205552	-0.198223	-0.141785	-0.213726	-0.202606	-0.167936	-0.196307	-0.283463	-0.346345	-0.0970772	-0.167695	-0.122089	-0.0931304	-0.107929	0.0746796	-0.123375	-0.125322	-0.188253	-0.0906098	-0.116657	-0.240698	0.219772	-0.280731	-0.132209	0.100282	0.303384	-0.113852	0.0799535	-0.252536	-0.0186988	-0.040101	0.0535411	-0.397586	0.24429	0.105166	-0.0427557	0.259916	0.146918	-0.032925	0	-0.278811	0.164615	-0.00385245
	IC76	0.0308165	0.00377178	0.0352444	0.0935229	0.132201	0.111977	0.0935997	0.144842	0.115555	0.0976769	0.0953999	0.255776	0.236924	0.103557	0.121799	0.0737294	0.0148109	0.0280515	0.0103069	0.0730901	0.0939551	0.106043	0.0977984	0.0389496	0.154648	-0.161001	0.207954	0.0846636	-0.136985	-0.212771	0.0886339	-0.08862	0.11543	-0.0339255	-0.0118075	-0.0270527	0.267405	-0.170837	-0.0360258	0.0363004	-0.103819	-0.0826855	0.0461785	-0.278811	0	-0.105834	-0.0296652
	IC80	0.0251819	0.0149433	0.0408607	-0.12363	-0.117153	-0.118243	-0.0607323	-0.117899	-0.0854157	-0.0967064	-0.0988431	-0.102722	-0.225722	-0.105188	-0.0857757	-0.0292349	-0.185114	-0.0259447	0.173936	-0.0195	-0.0375296	-0.0443746	-0.152383	-0.039326	-0.144967	0.0882395	-0.106583	-0.0638405	0.081868	0.151555	-0.0988462	0.0403893	-0.301677	-0.0015672	-0.0174159	-0.253363	-0.171865	0.0478488	0.138405	0.154797	0.224586	0.203934	0.0473092	0.164615	-0.105834	0	-0.00664034
CB	IC7	-0.0196408	0.121372	0.00942147	0.0102198	0.00238229	-0.0299069	0.0329392	0.0127971	-0.00442706	-0.0259323	-0.0298456	0.00169877	-0.040639	-0.00671487	0.0671423	0.0916558	0.0624126	0.0107219	-0.0274213	0.0321369	0.0559841	0.0106424	-0.0265975	-0.0757854	-0.0254072	0.01051	0.00224704	-0.0979103	-0.0241544	-0.0115827	-0.00326781	-0.0922685	0.00111582	-0.0453147	0.041739	-0.0265997	-0.0122672	0.00761707	-0.0278074	-0.0665571	0.0178074	0.0157786	0.0610023	-0.00385245	-0.0296652	-0.00664034	0
The strength of the connection between the different independent components (IC) is shown in the cell. Each cell's horizontal and vertical axesl correspond to the sub-networks and independent components involved in the connection strength. Abbreviations: cerebellum network (CBN); basal ganglia network (BGN); default mode network (DMN); central executive network (CEN); sensorimotor network (SMN); …

## Sheet: Sheet3-State 3 Matrix
Functional Connectivity Matrix for State 3
Subnetwork		BG				AUD	SMN									VIS									CEN															DMN								CB
		IC6	IC58	IC99	IC100	IC15	IC1	IC4	IC8	IC9	IC17	IC31	IC42	IC50	IC70	IC20	IC35	IC41	IC54	IC61	IC63	IC73	IC78	IC86	IC19	IC22	IC26	IC30	IC33	IC64	IC67	IC77	IC82	IC85	IC88	IC89	IC90	IC93	IC97	IC11	IC21	IC29	IC49	IC55	IC60	IC76	IC80	IC7
BG	IC6	0	0.0682462	0.0704966	0.223389	0.0410642	0.0758882	-0.0461418	0.0178545	0.0298084	0.0489793	0.0441173	0.00548782	0.0668862	-0.00852918	-0.0388366	-0.00649548	-0.020777	0.00948365	0.0333811	-0.0344828	-0.0481536	0.0151845	-0.0281028	0.106949	0.0651417	-0.105153	0.028333	0.108348	-0.00354866	-0.0221114	0.00498634	0.0220983	-0.0167514	0.0462578	0.0398556	-0.00371383	0.0699447	0.0147773	-0.0192647	0.0888304	-0.0214983	0.0120827	-0.0960813	-0.0272495	0.00113708	0.0173139	-0.050243
	IC58	0.0682462	0	0.148939	0.0754713	-0.0539799	-0.0414437	-0.0312826	-0.0335485	-0.0187787	0.0593207	-0.0631192	-0.0180687	-0.0313698	-0.00974073	-0.0381355	0.0154299	-0.0317548	-0.0564685	-0.00802342	-0.0319172	-0.019585	-0.0545416	-0.0542348	0.0166981	-0.0114995	-0.0406591	0.00956072	-0.0244378	-0.0448666	-0.0471079	0.0370578	-0.027036	0.017458	0.0088192	0.0689154	-0.00385084	0.0571594	0.0190772	-0.0148696	0.00256539	0.0142473	0.046366	-0.0180501	-0.0361393	0.0181759	0.00206172	0.0735213
	IC99	0.0704966	0.148939	0	0.0441567	-0.0383455	-0.0349557	-0.0390981	-0.04208	-0.0309621	0.0331251	-0.0193434	-0.0244654	-0.0155176	0.00236472	-0.0449505	-0.00157513	-0.03579	-0.030223	-0.0254815	-0.0688558	-0.0237781	-0.00785921	0.0148034	0.0801141	-0.00369864	-0.0507177	0.00787771	-0.041441	-0.0244885	-0.0439287	0.112366	-0.0451903	0.00306915	0.0184414	0.039152	-0.0118641	0.0942281	0.0727797	-0.00587604	0.102725	0.0120829	-0.010643	-0.00718159	-0.0418563	0.0496991	0.000444803	0.00344558
	IC100	0.223389	0.0754713	0.0441567	0	0.104571	0.10931	-0.00731048	0.0489789	0.0558853	0.122318	0.0164963	0.0113088	0.117706	-0.0212201	0.00778843	-0.0229216	0.00787472	0.00860154	-0.04443	-0.000238673	-0.0326244	-0.00286767	-0.0256234	0.0976954	0.10438	-0.0897093	0.0824415	0.110451	0.0099421	-0.0415124	0.030961	0.0138558	0.0440721	0.0329372	0.0822619	0.0559565	0.0947321	0.00860976	-0.0442082	0.0279379	-0.0584173	-0.0024992	-0.157604	-0.0252193	-0.0194346	-0.0482236	-0.000534855
AUD	IC15	0.0410642	-0.0539799	-0.0383455	0.104571	0	0.113359	0.0500007	0.07828	0.104811	0.0762109	0.038076	0.0657079	0.0986528	-0.0466639	0.1077	-0.00540726	0.0135579	0.0519215	-0.0232684	0.0534143	0.00228178	0.0698683	-0.0891798	0.0952437	0.0994148	-0.0514454	0.155345	0.117998	0.0406695	-0.0763052	-0.0429101	0.00057707	0.0020454	-0.0418464	0.0790706	0.0418454	0.00634764	-0.0188102	-0.0434572	0.0149869	-0.0574742	0.0569497	-0.128669	0.0114958	-0.0434135	-0.00591879	0.012363
SMN	IC1	0.0758882	-0.0414437	-0.0349557	0.10931	0.113359	0	0.0573564	0.160728	0.154494	0.0693421	0.07054	0.0336286	0.126847	0.0331992	0.0679977	0.013863	0.00448329	0.0611586	-0.000444528	0.0561685	0.0242568	0.0461042	-0.0242984	0.0169575	0.127218	-0.0647335	0.0738881	0.135575	-0.0137272	-0.0444501	-0.0310939	0.0157411	0.00255387	-0.000554211	0.0258314	0.0020433	0.0129051	-0.0490608	-0.0551367	0.0268557	-0.0516917	0.0127856	-0.104639	-0.00638699	-0.00793051	0.00462467	-0.0201762
	IC4	-0.0461418	-0.0312826	-0.0390981	-0.00731048	0.0500007	0.0573564	0	0.153753	0.142611	-0.00209876	-0.000185174	0.154043	0.0273975	0.0356796	0.0498483	0.0825124	-0.00434278	0.0086173	-0.00703145	0.00763774	0.0380196	0.044966	0.00414074	-0.0633193	0.00442449	-0.0171881	0.121062	0.00270591	-0.0314366	-0.0331488	-0.0282477	-0.0680357	0.00460866	-0.0533892	0.00110541	-0.0383403	0.00589074	-0.0288257	0.0175713	-0.00880306	0.000646555	0.0374847	0.00824843	-0.0267937	0.0501762	-0.00399363	0.0206228
	IC8	0.0178545	-0.0335485	-0.04208	0.0489789	0.07828	0.160728	0.153753	0	0.294304	0.0247907	0.0525149	0.102446	0.0478955	0.0487791	0.10141	0.0784537	0.0394722	0.0410193	-0.0138089	0.0780947	0.0484808	0.0704629	0.00131022	-0.0491966	0.0257476	-0.0418349	0.0855727	0.0570168	-0.045118	-0.0441984	-0.046377	-0.0310475	-0.0244385	-0.0184993	0.00333788	-0.0110169	-0.0112201	-0.0362245	-0.020207	-0.0199541	-0.043278	0.0232685	-0.0796138	-0.00954839	0.0013513	-0.0204712	0.0157613
	IC9	0.0298084	-0.0187787	-0.0309621	0.0558853	0.104811	0.154494	0.142611	0.294304	0	0.0490945	0.0586537	0.104113	0.0380993	0.110045	0.097489	0.0734161	0.0197328	0.0475093	-0.00220226	0.0680254	0.0491982	0.0767451	-0.0200264	-0.0322822	0.0461771	-0.0458493	0.0975695	0.0398638	-0.0446809	-0.0661089	-0.0230987	-0.0479005	-0.0366287	-0.0329552	0.042927	-0.0298127	0.00918414	-0.0381172	-0.026932	-0.0102404	-0.0244264	0.0333217	-0.0813527	-0.0360949	-0.00297901	-0.0140935	0.0318462
	IC17	0.0489793	0.0593207	0.0331251	0.122318	0.0762109	0.0693421	-0.00209876	0.0247907	0.0490945	0	-0.0111192	0.0426591	0.0476487	8.93815e-05	0.0278328	0.0154713	-0.0494413	0.0133342	-0.0564702	0.00782358	0.00606256	0.0290661	0.0301243	0.0574637	0.0550245	-0.0927883	0.0980616	0.0529995	-0.0278909	-0.0594928	0.0362958	0.0293203	0.0358067	0.0471868	0.0741931	-0.00393535	0.0774293	0.00921256	-0.0196445	-0.0189537	-0.0433108	-0.0371463	-0.0603345	-0.0620919	0.0145194	-0.0279164	-0.00230553
	IC31	0.0441173	-0.0631192	-0.0193434	0.0164963	0.038076	0.07054	-0.000185174	0.0525149	0.0586537	-0.0111192	0	0.113175	0.117807	0.0916987	0.0423722	-0.0157917	0.065051	0.0124651	-0.0416111	0.0221968	0.0050219	0.00856768	0.0428871	0.0148211	0.065319	-0.0639747	0.0241484	0.07377	0.0391713	0.00591516	-0.0509988	0.073437	0.0578037	0.0331495	-0.0435236	-0.0160012	0.0265241	-0.0118835	-0.0311595	-0.0360104	-0.148331	-0.0767414	-0.0214198	-0.0936664	0.0300886	-0.0297348	-0.0319399
	IC42	0.00548782	-0.0180687	-0.0244654	0.0113088	0.0657079	0.0336286	0.154043	0.102446	0.104113	0.0426591	0.113175	0	0.128311	0.06605	0.0948106	0.0600597	0.0187949	0.00903757	0.00388651	0.0324055	0.0470998	0.0509153	0.0266165	-0.036786	0.0527321	-0.0865744	0.165136	0.0529624	-0.0527185	-0.095359	-0.0192905	-0.0870839	0.00194083	-0.0334896	-0.0145358	-0.0796838	0.0739462	-0.0870015	-0.00528748	-0.0154578	-0.0515417	-0.00344338	0.0525239	-0.126868	0.154829	-0.00962907	-0.0023066
	IC50	0.0668862	-0.0313698	-0.0155176	0.117706	0.0986528	0.126847	0.0273975	0.0478955	0.0380993	0.0476487	0.117807	0.128311	0	-0.00877537	0.0411201	-0.0466923	0.02956	0.0467523	-0.0297008	0.0270124	-0.0175281	0.00950331	0.0379179	0.0675501	0.223922	-0.114043	0.150745	0.177855	-0.00749096	-0.113886	0.00255561	-0.0180433	0.148325	0.0360162	-0.0244697	0.0116214	0.157199	-0.0713865	-0.0295508	0.0246351	-0.130189	-0.0976121	-0.0334272	-0.168637	0.105039	-0.0891558	-0.0494447
	IC70	-0.00852918	-0.00974073	0.00236472	-0.0212201	-0.0466639	0.0331992	0.0356796	0.0487791	0.110045	8.93815e-05	0.0916987	0.06605	-0.00877537	0	0.0069987	0.033447	0.0623813	-0.0317121	-0.0618095	-0.0402386	0.0264751	0.0222175	0.117995	-0.0861519	-0.0108067	-0.0482423	-0.0224853	-0.0412635	-0.049677	-0.00753953	0.0182784	0.0029011	0.0290082	-0.0149427	-0.0355009	0.0338049	0.000985946	0.038086	-0.0282754	-0.0849419	-0.0240606	-0.0388914	-0.0167056	-0.0382233	0.039686	-0.0893591	0.0238614
VIS	IC20	-0.0388366	-0.0381355	-0.0449505	0.00778843	0.1077	0.0679977	0.0498483	0.10141	0.097489	0.0278328	0.0423722	0.0948106	0.0411201	0.0069987	0	0.100311	0.0595358	0.102384	-0.0480372	0.190368	0.108192	0.101701	-0.00198644	-0.0105583	0.00100688	0.0186808	0.0430319	0.0400602	-0.0159771	-0.0803038	0.0126876	-0.0747792	0.00274737	-0.0265327	0.0596687	-0.0143824	-0.0262094	-0.0538489	-0.0322343	-0.0331493	-0.0501013	0.0389495	-0.0257527	-0.0118666	-0.00399846	-0.0178711	0.0447221
	IC35	-0.00649548	0.0154299	-0.00157513	-0.0229216	-0.00540726	0.013863	0.0825124	0.0784537	0.0734161	0.0154713	-0.0157917	0.0600597	-0.0466923	0.033447	0.100311	0	-0.00330369	0.0638878	0.0507046	0.0570509	0.110278	0.160032	0.02571	-0.0635844	-0.0406119	-0.00413462	0.0239004	-0.0397239	-0.0539831	-0.0531938	-0.0236625	-0.0652269	-0.0232449	-0.0651914	0.0250396	-0.0340401	-0.01268	-0.0294464	-0.000239035	-0.0131491	0.0436451	0.0426441	0.0129226	-0.0194432	0.00632452	-0.0210579	0.0670072
	IC41	-0.020777	-0.0317548	-0.03579	0.00787472	0.0135579	0.00448329	-0.00434278	0.0394722	0.0197328	-0.0494413	0.065051	0.0187949	0.02956	0.0623813	0.0595358	-0.00330369	0	0.0357768	-0.0729493	0.067597	0.0474638	-0.00702743	0.0413123	-0.0222997	0.00216291	0.0125105	-0.0100029	-0.0595154	-0.0028756	-0.0076129	-0.0337825	-0.00454496	0.064223	-0.0597929	0.0110691	0.0574317	-0.0557058	-0.0094522	-0.0697173	-0.0557592	-0.0432393	0.00872951	-0.0225801	0.0115396	-0.0403842	-0.0906956	0.0584322
	IC54	0.00948365	-0.0564685	-0.030223	0.00860154	0.0519215	0.0611586	0.0086173	0.0410193	0.0475093	0.0133342	0.0124651	0.00903757	0.0467523	-0.0317121	0.102384	0.0638878	0.0357768	0	0.0448194	0.110396	0.0701358	0.153983	0.0244542	0.0339493	0.0200315	0.0111842	0.0221038	0.0236607	-0.0288861	-0.036635	0.0398111	-0.0313407	0.00448785	-0.00525399	0.0189505	-0.0440108	0.00105853	-0.0331672	0.0398001	0.0247553	0.0322956	-0.0275682	0.0198263	-0.0252893	-0.0228241	-0.0251529	-0.0146752
	IC61	0.0333811	-0.00802342	-0.0254815	-0.04443	-0.0232684	-0.000444528	-0.00703145	-0.0138089	-0.00220226	-0.0564702	-0.0416111	0.00388651	-0.0297008	-0.0618095	-0.0480372	0.0507046	-0.0729493	0.0448194	0	-0.0551937	-0.000749243	0.0178547	0.00640962	-0.00459833	-0.0147005	0.0291565	-0.0144677	0.0127003	-0.0966178	0.0131768	-0.0342799	-0.0216537	-0.0969171	-0.0214203	-0.0552521	-0.129991	-0.0150886	-0.103468	0.0972679	0.146744	0.223509	0.059678	0.0974263	-0.00864933	0.0453195	0.114241	-0.0718112
	IC63	-0.0344828	-0.0319172	-0.0688558	-0.000238673	0.0534143	0.0561685	0.00763774	0.0780947	0.0680254	0.00782358	0.0221968	0.0324055	0.0270124	-0.0402386	0.190368	0.0570509	0.067597	0.110396	-0.0551937	0	0.112786	0.0517805	-0.0449459	0.0082219	0.019608	0.0534414	-0.00672215	0.00322546	0.0269018	-0.0582875	-0.015895	-0.0254144	-0.0072425	0.0126581	0.0287716	-0.0285657	-0.0424253	-0.088026	-0.0302903	-0.0122671	-0.069083	0.0408769	-0.0529053	-0.0228789	-0.0477549	0.0203462	0.0274543
	IC73	-0.0481536	-0.019585	-0.0237781	-0.0326244	0.00228178	0.0242568	0.0380196	0.0484808	0.0491982	0.00606256	0.0050219	0.0470998	-0.0175281	0.0264751	0.108192	0.110278	0.0474638	0.0701358	-0.000749243	0.112786	0	0.105399	0.0314692	-0.0600982	-0.00969221	-0.00496119	-0.00837607	-0.0129972	-0.0544664	-0.0511285	-0.0111811	-0.0560527	-0.0277715	-0.0384047	-0.00577566	-0.0498789	-0.0577065	-0.0787107	-0.056159	-0.0313894	0.000713279	0.00667616	0.0316351	-0.0110643	0.0311623	-0.00642632	0.0241823
	IC78	0.0151845	-0.0545416	-0.00785921	-0.00286767	0.0698683	0.0461042	0.044966	0.0704629	0.0767451	0.0290661	0.00856768	0.0509153	0.00950331	0.0222175	0.101701	0.160032	-0.00702743	0.153983	0.0178547	0.0517805	0.105399	0	0.0406242	-0.0135896	0.0114778	-0.0368515	0.0306663	0.0304213	-0.0287917	-0.0522542	0.000197716	-0.0294098	0.00412207	-0.0137541	0.0170662	-0.00136513	0.000974864	-0.0190295	-0.0330527	0.00354707	-0.0206613	0.00200695	-0.023953	-0.0323803	-0.00386292	-0.0519168	-0.00471112
	IC86	-0.0281028	-0.0542348	0.0148034	-0.0256234	-0.0891798	-0.0242984	0.00414074	0.00131022	-0.0200264	0.0301243	0.0428871	0.0266165	0.0379179	0.117995	-0.00198644	0.02571	0.0413123	0.0244542	0.00640962	-0.0449459	0.0314692	0.0406242	0	-0.0577711	-0.0257902	-0.0431597	-0.0489896	-0.0195594	-0.0604514	0.0882071	0.00874139	0.0136988	0.0913783	0.0445143	-0.156253	0.0177931	0.033037	0.0118109	-0.00854032	-0.0657877	-0.0110756	-0.211497	0.115478	-0.0701044	0.085011	-0.115542	-0.0618743
CEN	IC19	0.106949	0.0166981	0.0801141	0.0976954	0.0952437	0.0169575	-0.0633193	-0.0491966	-0.0322822	0.0574637	0.0148211	-0.036786	0.0675501	-0.0861519	-0.0105583	-0.0635844	-0.0222997	0.0339493	-0.00459833	0.0082219	-0.0600982	-0.0135896	-0.0577711	0	0.0819918	-0.0231009	0.0394319	0.0630725	0.0509535	-0.0812184	0.0980977	0.0525481	0.0207101	0.0635368	0.105648	0.0420336	0.109026	0.0329165	-0.0320666	0.100554	-0.0820674	-0.0130294	-0.0610068	-0.0488691	-0.014006	0.00569987	-0.0538381
	IC22	0.0651417	-0.0114995	-0.00369864	0.10438	0.0994148	0.127218	0.00442449	0.0257476	0.0461771	0.0550245	0.065319	0.0527321	0.223922	-0.0108067	0.00100688	-0.0406119	0.00216291	0.0200315	-0.0147005	0.019608	-0.00969221	0.0114778	-0.0257902	0.0819918	0	-0.0826096	0.102662	0.11045	0.00137097	-0.0776222	0.0149517	-0.00064007	0.0666808	0.0294821	0.023534	0.0218071	0.124746	-0.0351329	-0.0447462	0.0303576	-0.0868317	-0.0433584	-0.0432782	-0.101766	0.0439255	-0.0464588	-0.0111756
	IC26	-0.105153	-0.0406591	-0.0507177	-0.0897093	-0.0514454	-0.0647335	-0.0171881	-0.0418349	-0.0458493	-0.0927883	-0.0639747	-0.0865744	-0.114043	-0.0482423	0.0186808	-0.00413462	0.0125105	0.0111842	0.0291565	0.0534414	-0.00496119	-0.0368515	-0.0431597	-0.0231009	-0.0826096	0	-0.0795735	-0.0507099	0.0604034	0.0484563	-0.011364	-0.016866	-0.0415836	-0.0253984	-0.0108488	-0.0171958	-0.0856928	-0.0052365	0.0403935	-0.00503969	0.04971	0.0547123	0.0495944	0.0870866	-0.0694193	0.0457881	0.00352266
	IC30	0.028333	0.00956072	0.00787771	0.0824415	0.155345	0.0738881	0.121062	0.0855727	0.0975695	0.0980616	0.0241484	0.165136	0.150745	-0.0224853	0.0430319	0.0239004	-0.0100029	0.0221038	-0.0144677	-0.00672215	-0.00837607	0.0306663	-0.0489896	0.0394319	0.102662	-0.0795735	0	0.0919822	-0.0406942	-0.126896	-0.00251246	-0.0944252	0.0359864	-0.0971975	0.0711128	-0.0558434	0.120113	-0.0279365	0.0417857	0.0374449	-0.030013	0.0281339	-0.0150311	-0.0876844	0.0909387	-0.0148964	-0.0211558
	IC33	0.108348	-0.0244378	-0.041441	0.110451	0.117998	0.135575	0.00270591	0.0570168	0.0398638	0.0529995	0.07377	0.0529624	0.177855	-0.0412635	0.0400602	-0.0397239	-0.0595154	0.0236607	0.0127003	0.00322546	-0.0129972	0.0304213	-0.0195594	0.0630725	0.11045	-0.0507099	0.0919822	0	0.0450888	-0.00819381	-0.0290431	0.0345567	0.0249114	0.0389311	-0.0334027	-0.00801414	0.0793279	-0.0327549	-0.00307294	0.0289116	-0.061564	-0.025421	-0.0720989	-0.0414167	-0.00535359	0.0100445	-0.0750068
	IC64	-0.00354866	-0.0448666	-0.0244885	0.0099421	0.0406695	-0.0137272	-0.0314366	-0.045118	-0.0446809	-0.0278909	0.0391713	-0.0527185	-0.00749096	-0.049677	-0.0159771	-0.0539831	-0.0028756	-0.0288861	-0.0966178	0.0269018	-0.0544664	-0.0287917	-0.0604514	0.0509535	0.00137097	0.0604034	-0.0406942	0.0450888	0	0.111321	-0.055559	0.127826	0.0226095	0.0443227	-0.0651049	0.0867516	-0.0465729	0.113677	0.0374829	-0.0255845	-0.1821	-0.0468271	-0.0924151	0.0180275	-0.103401	0.0423241	-0.00395538
	IC67	-0.0221114	-0.0471079	-0.0439287	-0.0415124	-0.0763052	-0.0444501	-0.0331488	-0.0441984	-0.0661089	-0.0594928	0.00591516	-0.095359	-0.113886	-0.00753953	-0.0803038	-0.0531938	-0.0076129	-0.036635	0.0131768	-0.0582875	-0.0511285	-0.0522542	0.0882071	-0.0812184	-0.0776222	0.0484563	-0.126896	-0.00819381	0.111321	0	-0.0889656	0.111899	-0.0234691	0.0513068	-0.225792	-0.0128211	-0.119959	0.0967513	0.0666232	-0.0484233	0.0529236	-0.128705	0.0196306	0.136546	-0.0815126	0.0861624	-0.0339477
	IC77	0.00498634	0.0370578	0.112366	0.030961	-0.0429101	-0.0310939	-0.0282477	-0.046377	-0.0230987	0.0362958	-0.0509988	-0.0192905	0.00255561	0.0182784	0.0126876	-0.0236625	-0.0337825	0.0398111	-0.0342799	-0.015895	-0.0111811	0.000197716	0.00874139	0.0980977	0.0149517	-0.011364	-0.00251246	-0.0290431	-0.055559	-0.0889656	0	-0.0970895	0.0235372	0.0359962	0.0514074	0.00565662	0.163576	0.0615757	0.00712623	0.0367644	0.0293515	-0.062421	0.0385322	-0.0860447	0.083489	-0.0799421	0.00488273
	IC82	0.0220983	-0.027036	-0.0451903	0.0138558	0.00057707	0.0157411	-0.0680357	-0.0310475	-0.0479005	0.0293203	0.073437	-0.0870839	-0.0180433	0.0029011	-0.0747792	-0.0652269	-0.00454496	-0.0313407	-0.0216537	-0.0254144	-0.0560527	-0.0294098	0.0136988	0.0525481	-0.00064007	-0.016866	-0.0944252	0.0345567	0.127826	0.111899	-0.0970895	0	-0.000170982	0.0369654	-0.0201884	0.136137	-0.0604052	0.0784663	-0.0604592	-0.0453735	-0.0892017	-0.0461554	-0.100681	0.0569102	-0.0800892	0.0427654	-0.0515458
	IC85	-0.0167514	0.017458	0.00306915	0.0440721	0.0020454	0.00255387	0.00460866	-0.0244385	-0.0366287	0.0358067	0.0578037	0.00194083	0.148325	0.0290082	0.00274737	-0.0232449	0.064223	0.00448785	-0.0969171	-0.0072425	-0.0277715	0.00412207	0.0913783	0.0207101	0.0666808	-0.0415836	0.0359864	0.0249114	0.0226095	-0.0234691	0.0235372	-0.000170982	0	0.0440327	-0.045437	0.0798204	0.106942	-0.00468283	0.00436442	-0.0509492	-0.130083	-0.155815	-0.00641956	-0.138358	0.0159424	-0.195447	-0.0011542
	IC88	0.0462578	0.0088192	0.0184414	0.0329372	-0.0418464	-0.000554211	-0.0533892	-0.0184993	-0.0329552	0.0471868	0.0331495	-0.0334896	0.0360162	-0.0149427	-0.0265327	-0.0651914	-0.0597929	-0.00525399	-0.0214203	0.0126581	-0.0384047	-0.0137541	0.0445143	0.0635368	0.0294821	-0.0253984	-0.0971975	0.0389311	0.0443227	0.0513068	0.0359962	0.0369654	0.0440327	0	-0.0368165	0.00452948	0.0567418	0.0166655	-0.0157693	-0.0318745	-0.0933938	-0.137914	-0.0166793	-0.0754003	0.00261238	-0.0335724	-0.0447669
	IC89	0.0398556	0.0689154	0.039152	0.0822619	0.0790706	0.0258314	0.00110541	0.00333788	0.042927	0.0741931	-0.0435236	-0.0145358	-0.0244697	-0.0355009	0.0596687	0.0250396	0.0110691	0.0189505	-0.0552521	0.0287716	-0.00577566	0.0170662	-0.156253	0.105648	0.023534	-0.0108488	0.0711128	-0.0334027	-0.0651049	-0.225792	0.0514074	-0.0201884	-0.045437	-0.0368165	0	0.036003	0.00861887	0.00490052	-0.0844765	0.0424381	-0.0321479	0.203106	-0.0926093	0.022159	-0.0622583	0.00381112	0.0593744
	IC90	-0.00371383	-0.00385084	-0.0118641	0.0559565	0.0418454	0.0020433	-0.0383403	-0.0110169	-0.0298127	-0.00393535	-0.0160012	-0.0796838	0.0116214	0.0338049	-0.0143824	-0.0340401	0.0574317	-0.0440108	-0.129991	-0.0285657	-0.0498789	-0.00136513	0.0177931	0.0420336	0.0218071	-0.0171958	-0.0558434	-0.00801414	0.0867516	-0.0128211	0.00565662	0.136137	0.0798204	0.00452948	0.036003	0	-0.0381663	0.11415	-0.088482	-0.0783945	-0.127761	-0.00803122	-0.159134	0.103772	-0.0731417	-0.189367	0.00192971
	IC93	0.0699447	0.0571594	0.0942281	0.0947321	0.00634764	0.0129051	0.00589074	-0.0112201	0.00918414	0.0774293	0.0265241	0.0739462	0.157199	0.000985946	-0.0262094	-0.01268	-0.0557058	0.00105853	-0.0150886	-0.0424253	-0.0577065	0.000974864	0.033037	0.109026	0.124746	-0.0856928	0.120113	0.0793279	-0.0465729	-0.119959	0.163576	-0.0604052	0.106942	0.0567418	0.00861887	-0.0381663	0	-0.0233368	0.0304189	0.0805224	-0.0476429	-0.0917761	0.0263507	-0.203424	0.156548	-0.0785939	-0.0271589
	IC97	0.0147773	0.0190772	0.0727797	0.00860976	-0.0188102	-0.0490608	-0.0288257	-0.0362245	-0.0381172	0.00921256	-0.0118835	-0.0870015	-0.0713865	0.038086	-0.0538489	-0.0294464	-0.0094522	-0.0331672	-0.103468	-0.088026	-0.0787107	-0.0190295	0.0118109	0.0329165	-0.0351329	-0.0052365	-0.0279365	-0.0327549	0.113677	0.0967513	0.0615757	0.0784663	-0.00468283	0.0166655	0.00490052	0.11415	-0.0233368	0	0.0360886	-0.0194848	-0.0489301	-0.0719964	-0.113002	0.0875279	-0.0710908	-0.0305013	0.024176
DMN	IC11	-0.0192647	-0.0148696	-0.00587604	-0.0442082	-0.0434572	-0.0551367	0.0175713	-0.020207	-0.026932	-0.0196445	-0.0311595	-0.00528748	-0.0295508	-0.0282754	-0.0322343	-0.000239035	-0.0697173	0.0398001	0.0972679	-0.0302903	-0.056159	-0.0330527	-0.00854032	-0.0320666	-0.0447462	0.0403935	0.0417857	-0.00307294	0.0374829	0.0666232	0.00712623	-0.0604592	0.00436442	-0.0157693	-0.0844765	-0.088482	0.0304189	0.0360886	0	0.0964425	0.155792	-0.0142112	0.0641111	0.00272289	0.0185161	0.0665981	-0.0468374
	IC21	0.0888304	0.00256539	0.102725	0.0279379	0.0149869	0.0268557	-0.00880306	-0.0199541	-0.0102404	-0.0189537	-0.0360104	-0.0154578	0.0246351	-0.0849419	-0.0331493	-0.0131491	-0.0557592	0.0247553	0.146744	-0.0122671	-0.0313894	0.00354707	-0.0657877	0.100554	0.0303576	-0.00503969	0.0374449	0.0289116	-0.0255845	-0.0484233	0.0367644	-0.0453735	-0.0509492	-0.0318745	0.0424381	-0.0783945	0.0805224	-0.0194848	0.0964425	0	0.130375	0.130537	-0.0108719	-0.0154235	0.0349002	0.173614	-0.0534326
	IC29	-0.0214983	0.0142473	0.0120829	-0.0584173	-0.0574742	-0.0516917	0.000646555	-0.043278	-0.0244264	-0.0433108	-0.148331	-0.0515417	-0.130189	-0.0240606	-0.0501013	0.0436451	-0.0432393	0.0322956	0.223509	-0.069083	0.000713279	-0.0206613	-0.0110756	-0.0820674	-0.0868317	0.04971	-0.030013	-0.061564	-0.1821	0.0529236	0.0293515	-0.0892017	-0.130083	-0.0933938	-0.0321479	-0.127761	-0.0476429	-0.0489301	0.155792	0.130375	0	0.119177	0.100004	0.122936	0.0209132	0.112096	-0.00516386
	IC49	0.0120827	0.046366	-0.010643	-0.0024992	0.0569497	0.0127856	0.0374847	0.0232685	0.0333217	-0.0371463	-0.0767414	-0.00344338	-0.0976121	-0.0388914	0.0389495	0.0426441	0.00872951	-0.0275682	0.059678	0.0408769	0.00667616	0.00200695	-0.211497	-0.0130294	-0.0433584	0.0547123	0.0281339	-0.025421	-0.0468271	-0.128705	-0.062421	-0.0461554	-0.155815	-0.137914	0.203106	-0.00803122	-0.0917761	-0.0719964	-0.0142112	0.130537	0.119177	0	-0.0657556	0.148717	-0.0557292	0.146161	0.0385157
	IC55	-0.0960813	-0.0180501	-0.00718159	-0.157604	-0.128669	-0.104639	0.00824843	-0.0796138	-0.0813527	-0.0603345	-0.0214198	0.0525239	-0.0334272	-0.0167056	-0.0257527	0.0129226	-0.0225801	0.0198263	0.0974263	-0.0529053	0.0316351	-0.023953	0.115478	-0.0610068	-0.0432782	0.0495944	-0.0150311	-0.0720989	-0.0924151	0.0196306	0.0385322	-0.100681	-0.00641956	-0.0166793	-0.0926093	-0.159134	0.0263507	-0.113002	0.0641111	-0.0108719	0.100004	-0.0657556	0	-0.122638	0.150889	0.0126846	-0.0111032
	IC60	-0.0272495	-0.0361393	-0.0418563	-0.0252193	0.0114958	-0.00638699	-0.0267937	-0.00954839	-0.0360949	-0.0620919	-0.0936664	-0.126868	-0.168637	-0.0382233	-0.0118666	-0.0194432	0.0115396	-0.0252893	-0.00864933	-0.0228789	-0.0110643	-0.0323803	-0.0701044	-0.0488691	-0.101766	0.0870866	-0.0876844	-0.0414167	0.0180275	0.136546	-0.0860447	0.0569102	-0.138358	-0.0754003	0.022159	0.103772	-0.203424	0.0875279	0.00272289	-0.0154235	0.122936	0.148717	-0.122638	0	-0.162249	0.0571652	0.0123198
	IC76	0.00113708	0.0181759	0.0496991	-0.0194346	-0.0434135	-0.00793051	0.0501762	0.0013513	-0.00297901	0.0145194	0.0300886	0.154829	0.105039	0.039686	-0.00399846	0.00632452	-0.0403842	-0.0228241	0.0453195	-0.0477549	0.0311623	-0.00386292	0.085011	-0.014006	0.0439255	-0.0694193	0.0909387	-0.00535359	-0.103401	-0.0815126	0.083489	-0.0800892	0.0159424	0.00261238	-0.0622583	-0.0731417	0.156548	-0.0710908	0.0185161	0.0349002	0.0209132	-0.0557292	0.150889	-0.162249	0	-0.0262158	-0.0299358
	IC80	0.0173139	0.00206172	0.000444803	-0.0482236	-0.00591879	0.00462467	-0.00399363	-0.0204712	-0.0140935	-0.0279164	-0.0297348	-0.00962907	-0.0891558	-0.0893591	-0.0178711	-0.0210579	-0.0906956	-0.0251529	0.114241	0.0203462	-0.00642632	-0.0519168	-0.115542	0.00569987	-0.0464588	0.0457881	-0.0148964	0.0100445	0.0423241	0.0861624	-0.0799421	0.0427654	-0.195447	-0.0335724	0.00381112	-0.189367	-0.0785939	-0.0305013	0.0665981	0.173614	0.112096	0.146161	0.0126846	0.0571652	-0.0262158	0	-0.0287837
CB	IC7	-0.050243	0.0735213	0.00344558	-0.000534855	0.012363	-0.0201762	0.0206228	0.0157613	0.0318462	-0.00230553	-0.0319399	-0.0023066	-0.0494447	0.0238614	0.0447221	0.0670072	0.0584322	-0.0146752	-0.0718112	0.0274543	0.0241823	-0.00471112	-0.0618743	-0.0538381	-0.0111756	0.00352266	-0.0211558	-0.0750068	-0.00395538	-0.0339477	0.00488273	-0.0515458	-0.0011542	-0.0447669	0.0593744	0.00192971	-0.0271589	0.024176	-0.0468374	-0.0534326	-0.00516386	0.0385157	-0.0111032	0.0123198	-0.0299358	-0.0287837	0
The strength of the connection between the different independent components (IC) is shown in the cell. Each cell's horizontal and vertical axesl correspond to the sub-networks and independent components involved in the connection strength. Abbreviations: cerebellum network (CBN); basal ganglia network (BGN); default mode network (DMN); central executive network (CEN); sensorimotor network (SMN); …
